# Supplementary material for: Major Histocompatibility Complex Class I Chain-Related α (MICA) STR Polymorphisms in COVID-19 Patients
Source: MDPI journal article supplement (doi:10.3390/ijms23136979), 2022-06-23
Supplement: s1 [file s1]

Supplementary Table S2. HLA-B allele frequencies.

|          | Controls  |            | Asymptomatic |            | Moderate Patients |            | Severe Patients |            | COVID-19 Patients |            |
|----------|-----------|------------|--------------|------------|-------------------|------------|-----------------|------------|-------------------|------------|
|          | Frequency | Percentage | Frequency    | Percentage | Frequency         | Percentage | Frequency       | Percentage | Frequency         | Percentage |
| HLA-B*07 | 121       | 9.8        | 9            | 13.64      | 60                | 9.04       | 17              | 8.21       | 86                | 9.20       |
| HLA-B*08 | 61        | 4.9        | 3            | 4.55       | 36                | 5.42       | 4               | 1.93       | 43                | 4.60       |
| HLA-B*13 | 26        | 2.1        | 1            | 10.52      | 9                 | 1.36       | 3               | 1.45       | 13                | 1.39       |
| HLA-B*14 | 67        | 5.4        | 4            | 6.06       | 45                | 6.78       | 13              | 6.28       | 62                | 6.63       |
| HLA-B*15 | 62        | 5          | 4            | 6.06       | 27                | 4.07       | 9               | 4.35       | 40                | 4.28       |
| HLA-B*18 | 130       | 10.5       | 5            | 7.58       | 58                | 8.73       | 14              | 6.76       | 77                | 8.24       |
| HLA-B*27 | 43        | 3.5        | 3            | 4.55       | 14                | 2.11       | 9               | 4.35       | 26                | 2.78       |
| HLA-B*35 | 125       | 10.1       | 4            | 6.06       | 74                | 11.14      | 21              | 10.14      | 99                | 10.59      |
| HLA-B*37 | 13        | 1.1        | 0            | 0          | 0                 | 0          | 0               | 0          | 0                 | 0          |
| HLA-B*38 | 31        | 2.5        | 2            | 3.03       | 23                | 3.46       | 10              | 4.83       | 35                | 3.74       |
| HLA-B*39 | 17        | 1.4        | 3            | 4.55       | 13                | 1.96       | 2               | 0.97       | 18                | 1.93       |
| HLA-B*40 | 37        | 3          | 4            | 6.06       | 28                | 4.22       | 5               | 2.42       | 37                | 3.96       |
| HLA-B*41 | 15        | 1.2        | 2            | 3.03       | 10                | 1.51       | 3               | 1.45       | 15                | 1.60       |
| HLA-B*44 | 191       | 15.5       | 12           | 18.18      | 110               | 16.57      | 39              | 18.84      | 161               | 17.22      |
| HLA-B*45 | 20        | 1.6        | 0            | 0          | 13                | 1.96       | 0               | 0          | 13                | 1.39       |
| HLA-B*47 | 3         | 0.2        | 0            | 0          | 0                 | 0          | 0               | 0          | 0                 | 0          |
| HLA-B*48 | 1         | 0.1        | 0            | 0          | 0                 | 0          | 0               | 0          | 0                 | 0          |
| HLA-B*49 | 31        | 2.5        | 1            | 1.52       | 20                | 3.01       | 7               | 3.38       | 28                | 2.99       |
| HLA-B*50 | 39        | 3.2        | 1            | 1.52       | 14                | 2.11       | 10              | 4.83       | 25                | 2.67       |
| HLA-B*51 | 113       | 9.2        | 3            | 4.55       | 48                | 7.23       | 18              | 8.70       | 69                | 7.38       |
| HLA-B*52 | 19        | 1.5        | 1            | 1.52       | 10                | 1.51       | 6               | 2.90       | 17                | 1.82       |
| HLA-B*53 | 15        | 1.2        | 2            | 3.03       | 15                | 2.26       | 3               | 1.45       | 20                | 2.14       |
| HLA-B*55 | 9         | 0.7        | 1            | 1.52       | 13                | 1.96       | 2               | 0.97       | 16                | 1.71       |
| HLA-B*56 | 3         | 0.2        | 0            | 0          | 0                 | 0          | 0               | 0          | 0                 | 0          |
| HLA-B*57 | 26        | 2.1        | 1            | 1.52       | 22                | 3.31       | 12              | 5.80       | 35                | 3.74       |
| HLA-B*58 | 16        | 1.3        | 0            | 0          | 0                 | 0          | 0               | 0          | 0                 | 0          |

\*HLA alleles with frequency under 1% have been removed. No significant differences were found for the possible comparisons.
