# Supplementary material for: Major Histocompatibility Complex Class I Chain-Related α (MICA) STR Polymorphisms in COVID-19 Patients
Source: MDPI journal article supplement (doi:10.3390/ijms23136979), 2022-06-23
Supplement: s1 [file s1]

**Supplementary Table S1.** Linkage disequilibrium analysis between major histocompatibility complex class I chain-related gene A (MICA) and human leucocyte antigen (HLA)-B in COVID-19 patients.

|                          | FHO | FHE   | D'      | r <sup>2</sup> | χ <sup>2</sup> | p-value |
|--------------------------|-----|-------|---------|----------------|----------------|---------|
| <i>HLA-B*07/MICA*A51</i> | 83  | 18.91 | 0.9846  | 0.3251         | 307.5664       | <0.0001 |
| <i>HLA-B*41/MICA*A6</i>  | 15  | 5.22  | 1       | 0.0302         | 28.5839        | <0.0001 |
| <i>HLA-B*14/MICA*A5</i>  | 11  | 6.66  | 0.0814  | 0.0036         | 3.3975         | 0.065   |
| <i>HLA-B*35/MICA*A9</i>  | 51  | 17.45 | 0.4271  | 0.0927         | 87.6963        | <0.0001 |
| <i>HLA-B*50/MICA*A6</i>  | 25  | 8.69  | 1       | 0.0509         | 48.172         | <0.0001 |
| <i>HLA-B*40/MICA*A5</i>  | 24  | 4.11  | 0.6048  | 0.1192         | 112.8063       | <0.0001 |
| <i>HLA-B*27/MICA*A4</i>  | 25  | 3.36  | 1       | 0.1750         | 165.5967       | <0.0001 |
| <i>HLA-B*18/MICA*A4</i>  | 75  | 10.07 | 1       | 0.5553         | 525.3085       | <0.0001 |
| <i>HLA-B*57/MICA*A9</i>  | 34  | 6.18  | 1       | 0.1678         | 158.7039       | <0.0001 |
| <i>HLA-B*44/MICA*A51</i> | 43  | 35.8  | 0.0584  | 0.0024         | 2.2462         | 0.1339  |
| <i>HLA-B*51/MICA*A6</i>  | 58  | 23.3  | 0.7940  | 0.0901         | 85.2621        | <0.0001 |
| <i>HLA-B*15/MICA*A5</i>  | 30  | 4.33  | 0.7404  | 0.1888         | 178.6118       | <0.0001 |
| <i>HLA-B*44/MICA*A6</i>  | 114 | 55.3  | 0.5661  | 0.1214         | 114.8525       | <0.0001 |
| <i>HLA-B*35/MICA*A6</i>  | 13  | 33.39 | -0.6106 | 0.0225         | 21.2424        | <0.0001 |
| <i>HLA-B*40/MICA*A51</i> | 12  | 8.33  | 0.1280  | 0.0023         | 2.1705         | 0.1407  |
| <i>HLA-B*08/MICA*A51</i> | 42  | 9.46  | 1       | 0.1599         | 151.2503       | <0.0001 |
| <i>HLA-B*14/MICA*A6</i>  | 49  | 20.87 | 0.7189  | 0.6565         | 62.0934        | <0.0001 |
| <i>HLA-B*39/MICA*A9</i>  | 16  | 3.09  | 0.9281  | 0.0709         | 67.1013        | <0.0001 |
| <i>HLA-B*38/MICA*A9</i>  | 33  | 6.36  | 0.9302  | 0.1496         | 141.5036       | <0.0001 |
| <i>HLA-B*53/MICA*A9</i>  | 19  | 3.64  | 0.9389  | 0.0857         | 81.0496        | <0.0001 |
| <i>HLA-B*55/MICA*A4</i>  | 16  | 2.15  | 1       | 0.1109         | 104.9563       | <0.0001 |
| <i>HLA-B*13/MICA*A51</i> | 13  | 2.93  | 1       | 0.0479         | 45.3604        | <0.0001 |
| <i>HLA-B*49/MICA*A6</i>  | 28  | 9.74  | 1       | 0.0572         | 54.1123        | <0.0001 |
| <i>HLA-B*52/MICA*A6</i>  | 16  | 5.91  | 0.9098  | 0.0284         | 26.8729        | <0.0001 |
| <i>HLA-B*35/MICA*A5</i>  | 32  | 10.66 | 0.2501  | 0.0566         | 53.5272        | <0.0001 |
| <i>HLA-B*58/MICA*A9</i>  | 10  | 1.82  | 1       | 0.0481         | 45.4808        | <0.0001 |

Only the haplotypes with frequency higher than 1% are shown. The false discovery rate (FDR)-based Benjamini and Lui (BL) method was used to the correction for multiple testing. P-value was considered significant only when it was smaller than its corresponding BL critical value. FHO: haplotypic frequency observed; FHE: haplotypic frequency expected; D': 5 standardized D; r<sup>2</sup>: correlation index.
